# Supplementary material
Source: HighWire-hosted journal article supplement (https://erj.ersjournals.com/content/55/5/2000501)
Supplement: inline-supplementary-material-1 [file inline-supplementary-material-1.pdf]

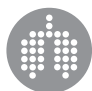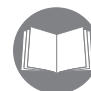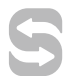

SHAREABLE PDF

# PLEASE, take a deep breath

José M. Porcel 

**Affiliation:** Pleural Medicine Unit, Dept of Internal Medicine, Arnau de Vilanova University Hospital, IRBLleida, University of Lleida, Lleida, Spain.

**Correspondence:** José M. Porcel, Pleural Medicine Unit, Dept of Internal Medicine, Arnau de Vilanova University Hospital, Avda Alcalde Rovira Roure 80, 25198 Lleida, Spain. E-mail: jporcel@yahoo.es

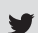

@ERSpublications

**Combining history taking and a bedside ultrasound may be the best way to predict symptomatic relief after thoracentesis in patients with pleural effusions** <http://bit.ly/2xwTJ9z>

**Cite this article as:** Porcel JM. PLEASE, take a deep breath. *Eur Respir J* 2020; 55: 2000501 [<https://doi.org/10.1183/13993003.00501-2020>].

This single-page version can be shared freely online.

Dyspnoea, a subjective experience of breathing discomfort, is a debilitating symptom which impacts quality of life in patients with pleural effusions. It consists of a number of perceptions, including a sense of work/effort, tightness in the chest and air hunger. Dyspnoea affects up to 80% of patients with malignant pleurisy [1–3], and an even higher percentage of those with heart failure-associated effusions [4]. Pleural effusions can have a large impact, not only on breathing and quality of life [5], but also on sleep [6] and exercise capacity [7].
